# Supplementary material for: Online Positive Affect Journaling in the Improvement of Mental Distress and Well-Being in General Medical Patients With Elevated Anxiety Symptoms: A Preliminary Randomized Controlled Trial
Source: PubMed Central journal article supplement (PMC6305886; doi:10.2196/11290), 2018-12-10
Supplement: mental_v5i4e11290_app1.pdf [file mental_v5i4e11290_app1.pdf]

Table 2. Outcome variables over time.

|                                                           |      | Control (n=30)        |                            |          | Intervention (n=32)   |                            |          | Intervention vs. Control |
|-----------------------------------------------------------|------|-----------------------|----------------------------|----------|-----------------------|----------------------------|----------|--------------------------|
| Outcome                                                   | Time | Mean [95% CI]<br>or % | <i>d</i><br>or<br><i>h</i> | <i>P</i> | Mean [95% CI]<br>or % | <i>d</i><br>or<br><i>h</i> | <i>P</i> | <i>P</i>                 |
| <b>Hospital Anxiety and Depression Scale – total</b>      |      |                       |                            |          |                       |                            |          |                          |
|                                                           | 0    | 14.4 [11.7, 17.1]     |                            |          | 13.8 [11.9, 15.7]     |                            |          |                          |
|                                                           | 1    | 14.8 [12.2, 17.3]     | .06                        | .44      | 11.4 [9.5, 13.2]      | .48                        | .06      | .01                      |
|                                                           | 2    | 14.3 [11.5, 17.1]     | .01                        | .72      | 11.5 [9.6, 13.5]      | .43                        | .06      | .03                      |
|                                                           | 3    | 14.3 [11.4, 17.1]     | .02                        | .92      | 12.2 [9.7, 14.6]      | .27                        | .25      | .27                      |
| <b>Hospital Anxiety and Depression Scale – anxiety</b>    |      |                       |                            |          |                       |                            |          |                          |
|                                                           | 0    | 9.6 [8.3, 10.9]       |                            |          | 10.0 [8.8, 11.2]      |                            |          |                          |
|                                                           | 1    | 9.7 [8.2, 11.1]       | .01                        | .60      | 7.9 [6.8, 9.0]        | .64                        | <0.001   | .01                      |
|                                                           | 2    | 9.1 [7.5, 10.6]       | .14                        | .18      | 8.2 [7.0, 9.3]        | .55                        | 0.002    | .09                      |
|                                                           | 3    | 9.0 [7.5, 10.5]       | .16                        | .14      | 8.3 [7.0, 9.6]        | .49                        | 0.003    | .19                      |
| <b>Hospital Anxiety and Depression Scale – depression</b> |      |                       |                            |          |                       |                            |          |                          |
|                                                           | 0    | 4.9 [3.3, 6.4]        |                            |          | 3.8 [2.9, 4.8]        |                            |          |                          |
|                                                           | 1    | 4.9 [3.3, 6.4]        | .02                        | .22      | 3.4 [2.4, 4.4]        | .14                        | .97      | .19                      |
|                                                           | 2    | 5.1 [3.7, 6.5]        | .06                        | .14      | 3.4 [2.3, 4.4]        | .16                        | .89      | .11                      |
|                                                           | 3    | 5.0 [3.5, 6.6]        | .04                        | .32      | 3.9 [2.5, 5.2]        | .02                        | .58      | .69                      |
| <b>Brief Resilience Scale</b>                             |      |                       |                            |          |                       |                            |          |                          |
|                                                           | 0    | 20.3 [18.7, 21.9]     |                            |          | 19.7 [17.6, 21.8]     |                            |          |                          |
|                                                           | 1    | 19.2 [17.2, 21.1]     | .24                        | .82      | 20.7 [18.8, 22.6]     | .17                        | .09      | .049                     |

|                                                     |   |                   |     |     |                   |     |     |      |
|-----------------------------------------------------|---|-------------------|-----|-----|-------------------|-----|-----|------|
|                                                     | 2 | 20.1 [18.3, 21.9] | .05 | .50 | 21.5 [19.5, 23.6] | .31 | .01 | .06  |
|                                                     | 3 | 20.1 [17.9, 22.3] | .04 | .43 | 20.9 [18.9, 22.8] | .20 | .08 | .35  |
| <b>Perceived Stress Scale</b>                       |   |                   |     |     |                   |     |     |      |
|                                                     | 0 | 19.9 [17.4, 22.4] |     |     | 19.0 [16.3, 21.7] |     |     |      |
|                                                     | 1 | 20.3 [17.7, 23.0] | .06 | .93 | 16.9 [14.5, 19.3] | .30 | .03 | .047 |
|                                                     | 2 | 18.9 [16.6, 21.3] | .15 | .27 | 16.6 [14.0, 19.3] | .32 | .02 | .24  |
|                                                     | 3 | 19.9 [17.1, 22.7] | .00 | .48 | 17.0 [14.1, 19.9] | .26 | .04 | .17  |
| <b>Satisfaction With Life Scale</b>                 |   |                   |     |     |                   |     |     |      |
|                                                     | 0 | 20.2 [17.4, 22.9] |     |     | 18.8 [15.9, 21.7] |     |     |      |
|                                                     | 1 | 20.3 [17.4, 23.3] | .02 | .78 | 19.8 [17.0, 22.5] | .12 | .50 | .69  |
|                                                     | 2 | 20.2 [17.1, 23.2] | .00 | .88 | 20.2 [17.3, 23.0] | .18 | .32 | .41  |
|                                                     | 3 | 20.3 [17.1, 23.5] | .02 | .73 | 19.6 [16.7, 22.5] | .10 | .59 | .86  |
| <b>Social Provisions Scale – total</b>              |   |                   |     |     |                   |     |     |      |
|                                                     | 0 | 79.0 [74.6, 83.3] |     |     | 79.5 [74.8, 84.1] |     |     |      |
|                                                     | 1 | 78.1 [73.3, 82.8] | .08 | .31 | 79.5 [75.2, 83.8] | .00 | .73 | .49  |
|                                                     | 2 | 78.2 [73.9, 82.5] | .07 | .41 | 81.8 [77.1, 86.5] | .18 | .48 | .11  |
|                                                     | 3 | 78.1 [73.2, 82.9] | .08 | .33 | 80.3 [75.8, 84.9] | .07 | .98 | .31  |
| <b>Social Provisions Scale – attachment</b>         |   |                   |     |     |                   |     |     |      |
|                                                     | 0 | 12.7 [11.7, 13.6] |     |     | 12.5 [11.5, 13.5] |     |     |      |
|                                                     | 1 | 12.2 [11.1, 13.4] | .15 | .47 | 12.7 [11.7, 13.8] | .08 | .66 | .29  |
|                                                     | 2 | 12.4 [11.5, 13.4] | .10 | .68 | 12.9 [11.8, 13.9] | .13 | .42 | .22  |
|                                                     | 3 | 12.6 [11.6, 13.6] | .02 | .89 | 13.1 [12.1, 14.1] | .20 | .23 | .18  |
| <b>Social Provisions Scale - social integration</b> |   |                   |     |     |                   |     |     |      |

|                                                             |   |                   |     |     |                   |     |     |     |
|-------------------------------------------------------------|---|-------------------|-----|-----|-------------------|-----|-----|-----|
|                                                             | 0 | 13.3 [12.4, 14.2] |     |     | 13.2 [12.1, 14.2] |     |     |     |
|                                                             | 1 | 12.7 [11.8, 13.6] | .26 | .11 | 12.9 [12.0, 13.7] | .11 | .40 | .43 |
|                                                             | 2 | 12.9 [12.0, 13.7] | .20 | .25 | 13.5 [12.6, 14.5] | .15 | .37 | .04 |
|                                                             | 3 | 12.4 [11.5, 13.2] | .42 | .03 | 13.2 [12.3, 14.1] | .01 | .93 | .05 |
| <b>Social Provisions Scale - reassurance of worth</b>       |   |                   |     |     |                   |     |     |     |
|                                                             | 0 | 12.6 [11.9, 13.3] |     |     | 13.2 [12.4, 13.9] |     |     |     |
|                                                             | 1 | 12.5 [11.6, 13.4] | .07 | .15 | 13.2 [12.3, 14.0] | .00 | .61 | .35 |
|                                                             | 2 | 12.2 [11.4, 13.1] | .19 | .09 | 13.6 [12.8, 14.4] | .20 | .84 | .05 |
|                                                             | 3 | 12.1 [11.2, 13.0] | .27 | .07 | 13.2 [12.4, 14.0] | .01 | .58 | .21 |
| <b>Social Provisions Scale - reliable alliance</b>          |   |                   |     |     |                   |     |     |     |
|                                                             | 0 | 13.3 [12.3, 14.3] |     |     | 13.6 [12.6, 14.5] |     |     |     |
|                                                             | 1 | 12.9 [11.7, 14.0] | .15 | .20 | 13.9 [13.1, 14.7] | .13 | .63 | .08 |
|                                                             | 2 | 13.3 [12.4, 14.3] | .01 | .79 | 14.3 [13.5, 15.2] | .30 | .16 | .08 |
|                                                             | 3 | 13.0 [11.9, 14.2] | .10 | .48 | 13.6 [12.6, 14.5] | .00 | .85 | .61 |
| <b>Social Provisions Scale – guidance</b>                   |   |                   |     |     |                   |     |     |     |
|                                                             | 0 | 13.1 [12.1, 14.0] |     |     | 13.5 [12.4, 14.5] |     |     |     |
|                                                             | 1 | 13.2 [12.3, 14.1] | .07 | .86 | 13.5 [12.5, 14.4] | .00 | .97 | .89 |
|                                                             | 2 | 13.0 [12.1, 13.9] | .03 | .73 | 13.7 [12.6, 14.9] | .09 | .60 | .39 |
|                                                             | 3 | 12.7 [11.7, 13.8] | .13 | .46 | 13.7 [12.8, 14.7] | .10 | .52 | .17 |
| <b>Social Provisions Scale - opportunity for nurturance</b> |   |                   |     |     |                   |     |     |     |
|                                                             | 0 | 13.8 [13.1, 14.5] |     |     | 13.5 [12.5, 14.4] |     |     |     |
|                                                             | 1 | 14.0 [13.2, 14.8] | .08 | .13 | 13.1 [12.2, 14.0] | .15 | .76 | .09 |
|                                                             | 2 | 13.9 [13.2, 14.7] | .05 | .15 | 13.4 [12.5, 14.3] | .03 | .62 | .35 |
|                                                             | 3 | 14.0 [13.2, 14.8] | .08 | .07 | 13.5 [12.6, 14.5] | .02 | .41 | .33 |

| <b>Positive and Negative Affect Scale - positive affect</b> |   |                   |     |     |                   |     |     |     |
|-------------------------------------------------------------|---|-------------------|-----|-----|-------------------|-----|-----|-----|
|                                                             | 0 | 32.9 [30.1, 35.8] |     |     | 30.6 [27.6, 33.6] |     |     |     |
|                                                             | 1 | 30.7 [27.7, 33.7] | .28 | .44 | 27.9 [24.3, 31.5] | .29 | .21 | .65 |
|                                                             | 2 | 30.8 [27.5, 34.2] | .25 | .46 | 29.2 [25.4, 33.0] | .14 | .51 | .91 |
|                                                             | 3 | 30.9 [27.6, 34.1] | .25 | .52 | 28.0 [24.0, 32.1] | .26 | .22 | .59 |
| <b>Positive and Negative Affect Scale - negative affect</b> |   |                   |     |     |                   |     |     |     |
|                                                             | 0 | 16.9 [14.1, 19.6] |     |     | 14.9 [13.0, 16.8] |     |     |     |
|                                                             | 1 | 19.6 [16.4, 22.8] | .34 | .14 | 15.8 [13.8, 17.7] | .16 | .89 | .17 |
|                                                             | 2 | 19.6 [16.8, 22.4] | .37 | .15 | 17.3 [14.7, 19.8] | .38 | .25 | .75 |
|                                                             | 3 | 18.7 [15.4, 22.0] | .23 | .42 | 16.0 [13.6, 18.5] | .19 | .73 | .61 |
| <b>General health (%)</b>                                   |   |                   |     |     |                   |     |     |     |
|                                                             | 0 | 45                |     |     | 59                |     |     |     |
|                                                             | 1 | 35                | .21 | .31 | 59                | .00 | .99 | .35 |
|                                                             | 2 | 30                | .31 | .14 | 53                | .13 | .14 | .43 |
|                                                             | 3 | 35                | .21 | .45 | 47                | .25 | .21 | .81 |
| <b>Days pain inhibited usual activities</b>                 |   |                   |     |     |                   |     |     |     |
|                                                             | 0 | 4.0 [1.6, 6.4]    |     |     | 3.7 [0.8, 6.5]    |     |     |     |
|                                                             | 1 | 4.9 [1.5, 8.2]    | .11 | .24 | 3.1 [0.3, 5.9]    | .08 | .95 | .24 |
|                                                             | 2 | 6.2 [3.0, 9.3]    | .29 | .02 | 3.3 [0.6, 6.0]    | .05 | .93 | .02 |
|                                                             | 3 | 3.9 [1.7, 6.0]    | .02 | .62 | 4.2 [1.0, 7.3]    | .06 | .49 | .86 |
| <b>Days not getting enough sleep</b>                        |   |                   |     |     |                   |     |     |     |
|                                                             | 0 | 13.8 [9.9, 17.7]  |     |     | 11.7 [8.3, 15.2]  |     |     |     |
|                                                             | 1 | 13.4 [9.7, 17.1]  | .05 | .51 | 11.1 [7.9, 14.3]  | .07 | .19 | .49 |

|                                             |   |                   |     |     |                   |     |            |     |
|---------------------------------------------|---|-------------------|-----|-----|-------------------|-----|------------|-----|
|                                             |   |                   |     |     |                   |     |            |     |
|                                             | 2 | 14.0 [10.5, 17.4] | .01 | .59 | 11.4 [8.2, 14.5]  | .04 | .23        | .51 |
|                                             | 3 | 13.6 [9.7, 17.4]  | .03 | .50 | 10.9 [7.6, 14.1]  | .10 | .19        | .55 |
| <b>Days felt healthy and full of energy</b> |   |                   |     |     |                   |     |            |     |
|                                             | 0 | 13.2 [9.7, 16.7]  |     |     | 14.8 [11.0, 18.7] |     |            |     |
|                                             | 1 | 12.9 [9.2, 16.5]  | .04 | .80 | 15.4 [11.6, 19.2] | .06 | .38        | .53 |
|                                             | 2 | 13.9 [10.4, 17.3] | .07 | .49 | 15.7 [12.1, 19.4] | .09 | .50        | .98 |
|                                             | 3 | 15.1 [11.6, 18.5] | .21 | .21 | 13.5 [10.0, 17.0] | .13 | .91        | .18 |
| <b>Better mental health (%)</b>             |   |                   |     |     |                   |     |            |     |
|                                             | 0 | 20                |     |     | 31                |     |            |     |
|                                             | 1 | 27                | .16 | .47 | 56                | .51 | <i>.03</i> | .37 |
|                                             | 2 | 30                | .23 | .36 | 44                | .26 | .32        | .97 |
|                                             | 3 | 41                | .47 | .02 | 41                | .19 | .37        | .28 |

*Note.* *P* values are from a linear mixed effects model (means) with group, month, and interaction between month and group as factors in addition to covariates for adjustment. Monthly means are raw means while change from baseline means are from the model adjusted for covariates. Significant *P* values are bold and italicized.
